# Supplementary material
Source: PubMed Central journal article supplement (PMC5703186)
Supplement: NIHMS909732-supplement-Table_1.pdf [file NIHMS909732-supplement-Table_1.pdf]

## Supplemental Data

Table I. Multifactorial Regression Models for Factors Influencing Mitogen-stimulated Cytokine Production in PBMCs of Mothers Prepartum and Fathers.

| <b>IL-5 (n=674)</b>    |                                   |                 |
|------------------------|-----------------------------------|-----------------|
| Variables included     | Regression coefficient (95% C.I.) | P-value         |
| <b>sex<sup>a</sup></b> | <b>-.161 (-.235, -.086)</b>       | <b>&lt;.001</b> |
| ethnicity <sup>b</sup> |                                   |                 |
| - Hispanic             | -.105 (-.202, -.009)              | .032            |
| - African American     | -.050 (-.354, .254)               | .746            |
| - other/missing        | .176 (.032, .320)                 | .016            |
| allergy                | <b>.142 (.059, .225)</b>          | <b>.001</b>     |
| skin test              | <b>.167 (.090, .245)</b>          | <b>&lt;.001</b> |
| smoking                | -.024 (-.167, .118)               | .736            |
| <b>IL-10 (n=702)</b>   |                                   |                 |
| <b>sex</b>             | <b>.236 (.146, .326)</b>          | <b>&lt;.001</b> |
| ethnicity              |                                   |                 |
| - Hispanic             | -.080 (-.194, .033)               | .166            |
| - African American     | .057 (-.269, .382)                | .733            |
| - other/missing        | -.051 (-.225, .122)               | .561            |
| allergy                | .028 (-.071, .127)                | .578            |
| skin test              | .037 (-.055, .129)                | .429            |
| smoking                | -.063 (-.236, .111)               | .480            |

| <b>IL-13 (n=680)</b> |                                   |             |
|----------------------|-----------------------------------|-------------|
| Variables included   | Regression coefficient (95% C.I.) | P-value     |
| <b>sex</b>           | <b>0.099 (0.036, 0.162)</b>       | <b>.002</b> |
| ethnicity            |                                   |             |
| - Hispanic           | <b>-.115 (-.194,-.036)</b>        | <b>.004</b> |
| - African American   | -.157 (-.382, .069)               | .173        |
| - other/missing      | .036 (-.086, .159)                | .560        |
| allergy              | .050 (-.020, .119)                | .163        |
| skin test            | .015 (-.049, .080)                | .637        |
| smoking              | .060 (-.060, .181)                | .329        |

<sup>a</sup>Prepartum mothers are the reference group.

<sup>b</sup>Non-Hispanic White is the reference group.
