# Supplementary material
Source: PubMed Central journal article supplement (PMC5703186)
Supplement: NIHMS909732-supplement-Table_2.pdf [file NIHMS909732-supplement-Table_2.pdf]

Table II. Multifactorial Regression Models for Factors Influencing Mitogen-stimulated Cytokine Production from PBMCs of Mothers Postpartum and Fathers.

| <b>IL-5 (n=724)</b>    |                                   |             |
|------------------------|-----------------------------------|-------------|
| Variables included     | Regression coefficient (95% C.I.) | P-value     |
| <b>sex<sup>a</sup></b> | <b>-.106 (-.177, -.034)</b>       | <b>.004</b> |
| ethnicity <sup>b</sup> |                                   |             |
| - Hispanic             | -.098 (-.189, -.006)              | .036        |
| - African American     | -.179 (-.465, .107)               | .219        |
| - other/missing        | .064 (-.073, .200)                | .361        |
| <b>allergy</b>         | <b>.106 ( .028, .185)</b>         | <b>.008</b> |
| <b>skin test</b>       | <b>.146 ( .073, .220)</b>         | <b>.000</b> |
| smoking                | .034 (-.104, .171)                | .631        |
| <b>IL-10 (n=714)</b>   |                                   |             |
| <b>sex</b>             | <b>.220 (.130, .310)</b>          | <b>.000</b> |
| ethnicity              |                                   |             |
| - Hispanic             | -.147 (-.261, -.033)              | .011        |
| - African American     | .012 (-.317, .341)                | .942        |
| - other/missing        | -.045 (-.218, .126)               | .603        |
| allergy                | .011 (-.087, .110)                | .819        |
| skin test              | .023 (-.070, .115)                | .628        |
| smoking                | -.053 (-.227, .120)               | .545        |

| <b>IL-13 (n=731)</b> |                             |             |
|----------------------|-----------------------------|-------------|
| sex                  | .037 (-.023, .098)          | .239        |
| <b>ethnicity</b>     |                             |             |
| <b>- Hispanic</b>    | <b>-.142 (-.219, -.065)</b> | <b>.000</b> |
| - African American   | -.175 (-.392, .041)         | .113        |
| - other/missing      | -.088 (-.203, .027)         | .136        |
| allergy              | .055 (-.012, .121)          | .106        |
| skin test            | .070 (.008, .133)           | .028        |
| smoking              | .128 (.009, .246)           | .034        |

<sup>a</sup>Postpartum mothers are the reference group.

<sup>b</sup>Non-Hispanic White was used as reference group.
