# Supplementary material
Source: PubMed Central journal article supplement (PMC5703186)
Supplement: NIHMS909732-supplement-Table_3.pdf [file NIHMS909732-supplement-Table_3.pdf]

## Supplemental Data

Table III. Allergen-Stimulated Cytokine Production by Parental Allergy<sup>a</sup>.

| Stimulus          | Cytokine      | Allergic          | Allergic   | Allergic | NonAllergic | NonAllergic | NonAllergic |
|-------------------|---------------|-------------------|------------|----------|-------------|-------------|-------------|
|                   |               | Mothers           | Mothers    |          | Fathers     | Mothers     |             |
|                   |               | Prepartum         | Postpartum | Fathers  | Prepartum   | Postpartum  | Fathers     |
| <i>Alternaria</i> | IFN- $\gamma$ |                   |            |          |             |             |             |
|                   | % detectable  | 15.5              | 21.7       | 21.4     | 22.6        | 33.1        | 33.1        |
|                   | n             | 84                | 92         | 70       | 155         | 169         | 166         |
|                   | IL-4          |                   |            |          |             |             |             |
|                   | % detectable  | 38.1              | 32.6       | 40.0     | 28.4        | 19.0        | 27.1        |
|                   | n             | 84                | 95         | 70       | 155         | 174         | 166         |
|                   | IL-13         |                   |            |          |             |             |             |
|                   | % detectable  | 44.0 <sup>b</sup> | 52.6       | 66.7     | 47.7        | 51.1        | 53.6        |
|                   | n             | 84                | 95         | 69       | 155         | 174         | 166         |
|                   |               |                   |            |          |             |             |             |
| Bermuda           | IFN- $\gamma$ |                   |            |          |             |             |             |
|                   | % detectable  | 2.9               | 12.0       | 3.7      | 7.1         | 5.5         | 7.2         |
|                   | n             | 68                | 83         | 54       | 127         | 145         | 139         |
|                   | IL-4          |                   |            |          |             |             |             |
|                   | % detectable  | 39.7              | 26.4       | 35.2     | 33.6        | 20.0        | 32.9        |
|                   | n             | 68                | 85         | 54       | 128         | 150         | 140         |
|                   | IL-13         |                   |            |          |             |             |             |
|                   | % detectable  | 13.2              | 28.2       | 22.2     | 12.5        | 17.3        | 19.3        |
|                   | n             | 68                | 85         | 54       | 128         | 150         | 140         |

<sup>a</sup>Allergy=physician-diagnosed asthma or allergic rhinitis

<sup>b</sup>p<.01 for comparison of prepartum mothers to fathers.
