# Supplementary material
Source: PubMed Central journal article supplement (PMC5703186)
Supplement: NIHMS909732-supplement-Table_4.pdf [file NIHMS909732-supplement-Table_4.pdf]

## Supplemental Data

Table IV. Allergen-Stimulated Cytokine Production from Peripheral Blood Mononuclear Cells of the Tucson Infant Immune Study Parents by Skin Test Sensitization Groups.

| Stimulus          | Cytokine      | ST+ <sup>a</sup>     | ST+                   | ST+               | ST-                  | ST-                   | ST-     |
|-------------------|---------------|----------------------|-----------------------|-------------------|----------------------|-----------------------|---------|
|                   |               | Mothers<br>Prepartum | Mothers<br>Postpartum | Fathers           | Mothers<br>Prepartum | Mothers<br>Postpartum | Fathers |
| <i>Alternaria</i> | IFN- $\gamma$ |                      |                       |                   |                      |                       |         |
|                   | % positive    | 21.4                 | 30.3                  | 29.8              | 17.8                 | 29.5                  | 29.5    |
|                   | n             | 168                  | 188                   | 181               | 73                   | 78                    | 61      |
|                   | IL-4          |                      |                       |                   |                      |                       |         |
|                   | % detectable  | 31.0                 | 26.7                  | 36.5 <sup>b</sup> | 38.4 <sup>cd</sup>   | 18.1                  | 14.8    |
|                   | n             | 168                  | 191                   | 181               | 73                   | 83                    | 61      |
| <i>Bermuda</i>    | IFN- $\gamma$ |                      |                       |                   |                      |                       |         |
|                   | % detectable  | 5.9                  | 10.1                  | 5.9               | 4.8                  | 1.6                   | 10.9    |
|                   | n             | 136                  | 169                   | 153               | 62                   | 64                    | 46      |
|                   | IL-4          |                      |                       |                   |                      |                       |         |
|                   | % detectable  | 38.2                 | 27.2 <sup>b</sup>     | 39.0 <sup>b</sup> | 31.7 <sup>cd</sup>   | 10.1                  | 8.7     |
|                   | n             | 136                  | 173                   | 154               | 63                   | 69                    | 46      |
| <i>Bermuda</i>    | IL-13         |                      |                       |                   |                      |                       |         |
|                   | % detectable  | 14.7                 | 26.9 <sup>b</sup>     | 24.7 <sup>b</sup> | 7.9                  | 7.2                   | 2.2     |
|                   | n             | 136                  | 171                   | 154               | 63                   | 69                    | 46      |

<sup>a</sup>ST+ = at least one positive skin test (see Methods for allergens applied).

<sup>b</sup>p<.01 for comparison of ST positive parent to corresponding ST negative parent.

<sup>c</sup>p<.01 for comparison of prepartum to postpartum samples.

<sup>d</sup>p<.01 for comparison of prepartum mothers to fathers.
